# Supplementary material for: Assessments of the Northern Hemisphere snow cover response to 1.5 and 2.0 °C warming
Source: Copernicus journal article supplement (doi:10.5194/esd-9-865-2018), 2018-06-21
Supplement: Supplementary file [file esd-9-865-2018-supplement.pdf]

Supplement of Earth Syst. Dynam., 9, 865–877, 2018  
<https://doi.org/10.5194/esd-9-865-2018-supplement>  
© Author(s) 2018. This work is distributed under  
the Creative Commons Attribution 4.0 License.

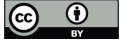

*Supplement of*

## **Assessments of the Northern Hemisphere snow cover response to 1.5 and 2.0°C warming**

**Aihui Wang et al.**

*Correspondence to:* Aihui Wang ([wangaihui@mail.iap.ac.cn](mailto:wangaihui@mail.iap.ac.cn))

The copyright of individual parts of the supplement might differ from the CC BY 4.0 License.

Table S1 General Information of 12 CMIP5 models.

| Model name    | Atmospheric horizontal resolution<br>lon°× lat° | Model levels | Model host center                                                                                                                  |
|---------------|-------------------------------------------------|--------------|------------------------------------------------------------------------------------------------------------------------------------|
| BCC-CSM1.1(m) | 1.1×1.1                                         | 26           | Beijing Climate Center, China Meteorological Administration, China                                                                 |
| BNU-ESM       | 2.8×2.8                                         | 26           | Beijing Normal University, China                                                                                                   |
| CanESM2       | 2.8×2.8                                         | 35           | Canadian Centre for Climate Modeling and Analysis, Canada                                                                          |
| CCSM4         | 1.25×1.0                                        | 26           | National Center for Atmospheric Research, United States                                                                            |
| CNRM-CM5      | 1.4×1.4                                         | 31           | National Centre for Meteorological Research, France                                                                                |
| FGOALS-g2     | 2.8×2.8                                         | 26           | ,Institute of Atmospheric Physics, Chinese Academy of Sciences                                                                     |
| FIO-ESM       | 2.8×2.8                                         | 26           | The first Institute of Oceanography, China                                                                                         |
| GISS-E2-H     | 2.5×2.0                                         | 40           | National Aeronautics and Space Administration Goddard Institute for Space Studies, United States                                   |
| MIROC-ESM     | 2.8×2.8                                         | 80           | Japan Agency for Marine-Earth Science and Technology, University of Tokyo, and National Institute for Environmental Studies, Japan |
| MPI-ESM-MR    | 1.9×1.9                                         | 95           | Max Planck Institute for Meteorology, Germany                                                                                      |
| MRI-CGCM3     | 1.1×1.1                                         | 48           | Meteorological Research Institute, Japan                                                                                           |
| NorESM1-M     | 2.5x1.9                                         | 26           | Norwegian Climate Center, Norway                                                                                                   |

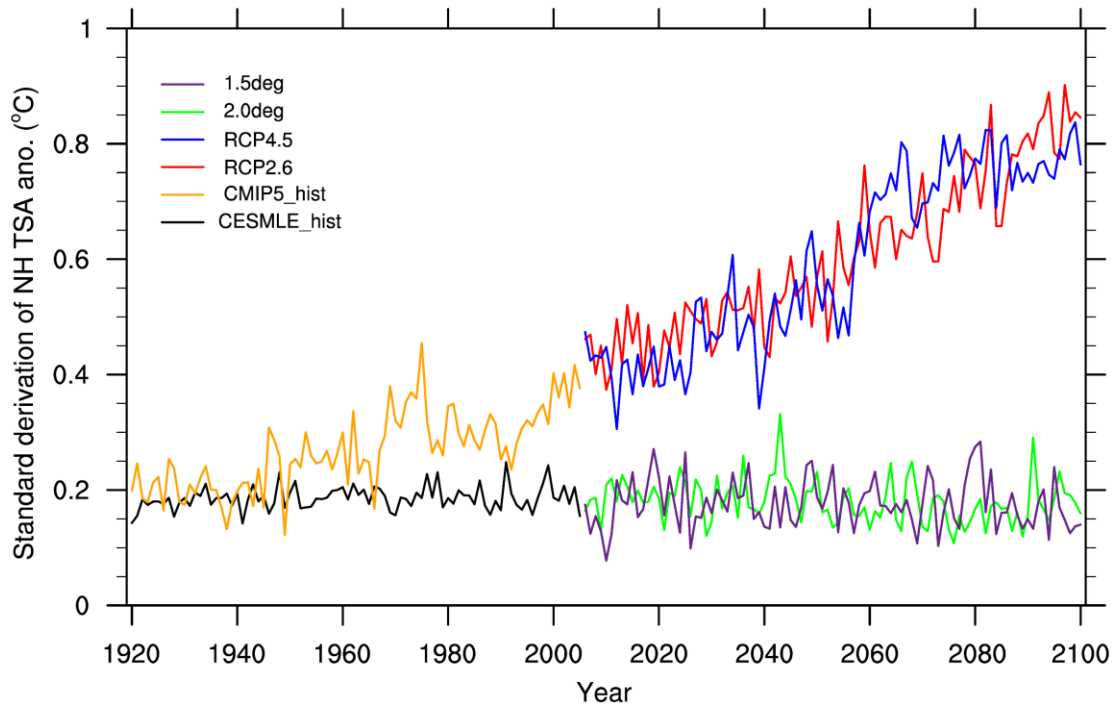

Figure S1 The annual standard deviation of land surface air temperature anomaly due to the ensemble variability for 1920-2100. Results from CESM-LE, CMIP5 historical, RCP2.6, RCP4.5, 1.5°C and 2.0°C scenarios are shown.
